# Supplementary material
Source: Springer Nature journal article supplement (https://www.springermedizin.de/resource/supplementary/12955_2009_656_MOESM7_ESM.pdf/9561016)

## Scores on SF-36 Subscales: Factor "Intact central visual field"

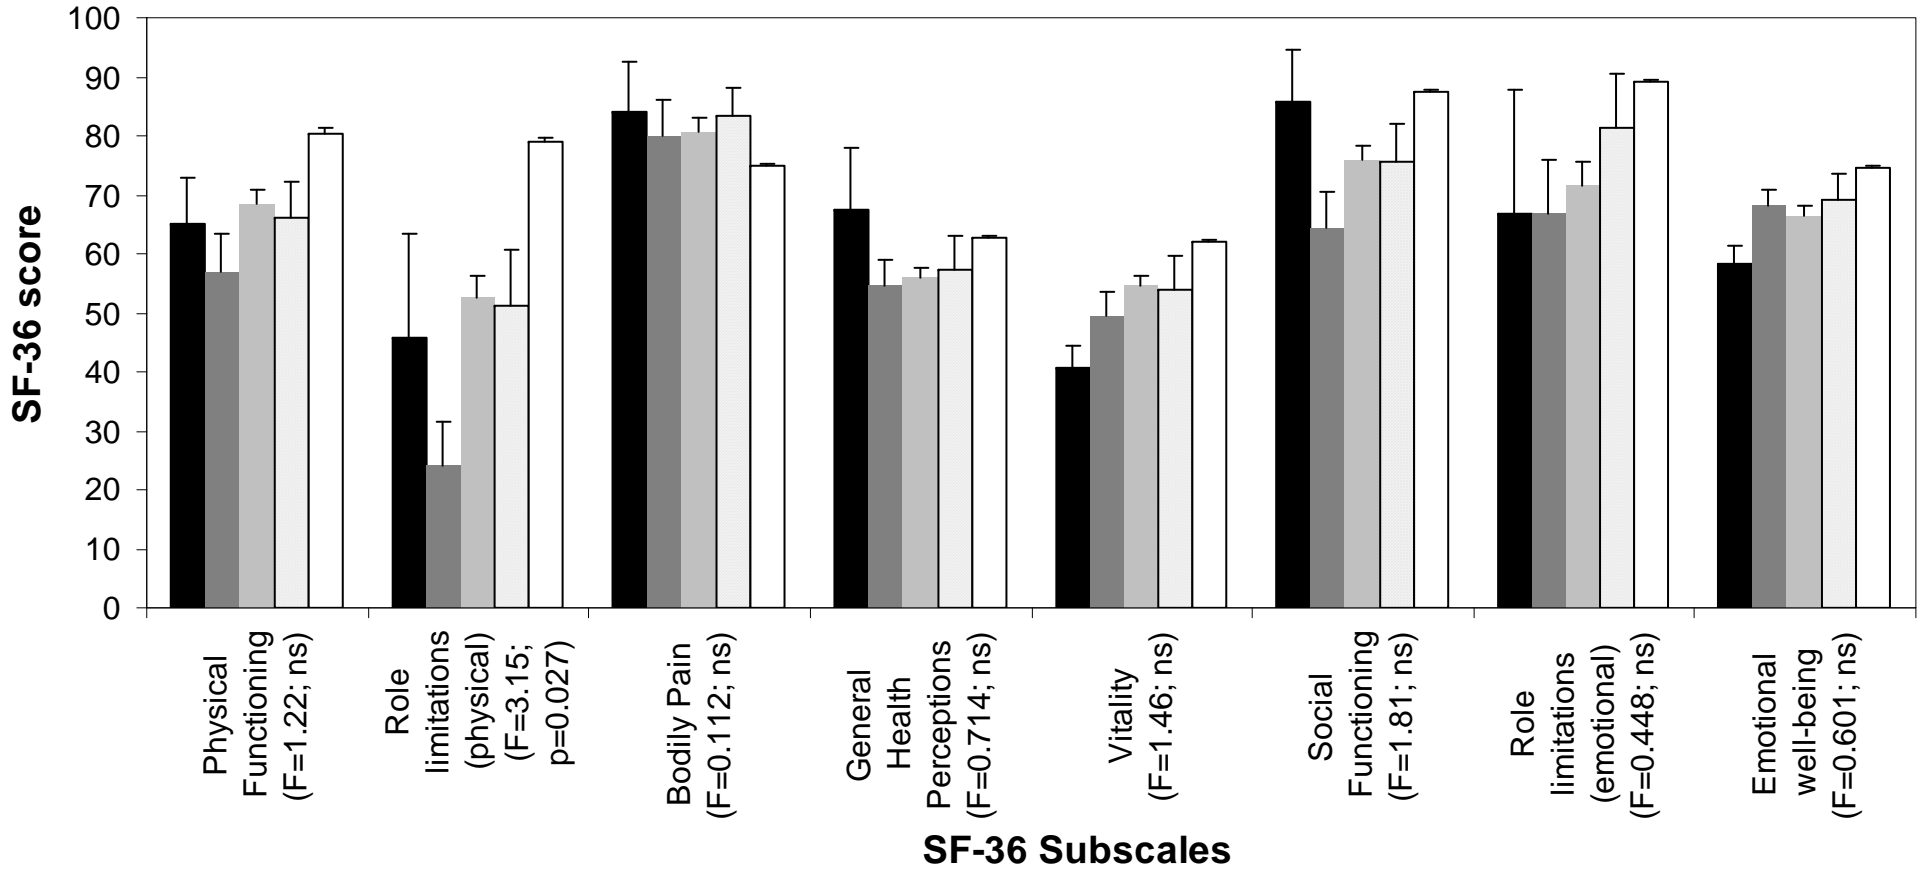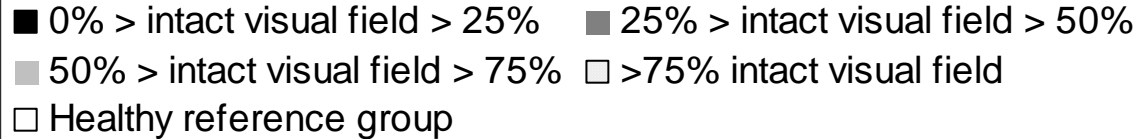

Supplement: MOESM7 [file 9561016]
